# Supplementary figures and images for: Impact of Germline Depletion of Bonus on Chromatin State in Drosophila Ovaries
Source: MDPI journal article supplement (doi:10.3390/cells12222629), 2023-11-15

Figure S1

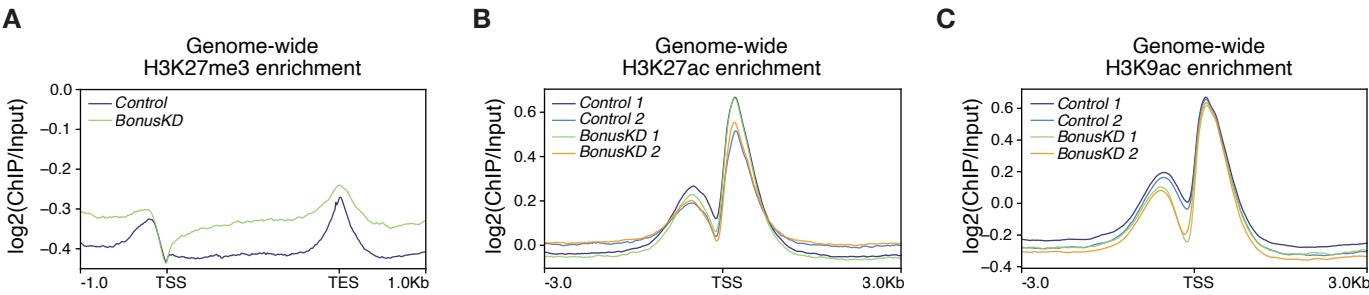

Supplement: s1 [file s1]
